# Supplementary material
Source: publisher figshare collection journal article supplement (https://springernature.figshare.com/ndownloader/files/14913293)
Supplement: Supplementary file 1 [file 14913293]

## Sheet: Sheet1
	Data file name(s) or identifier(s) (add accession number, DOI or web link to data where applicable)	Data file format(s) and file type	Location of data file(s) or repository name	How the data file can currently be accessed by other researchers
Datasets supporting your figures
Data supporting figure 1b	SKBR3 siBRCA1 KD	Excel; Prism	lab computer	contact Dr. Carpizo with data request
Data supporting figure 1c	figure only	Photoshop	lab computer	contact Dr. Carpizo with data request
Data supporting figure 1d	436_C6_15_R175H	Excel; Prism	lab computer	contact Dr. Carpizo with data request
Data supporting figure 1e	436_C6_wtp53	Excel; Prism	lab computer	contact Dr. Carpizo with data request
Data supporting figure 1g	pATR/ATR	Excel; Prism	lab computer	contact Dr. Carpizo with data request
Data supporting figure 2b	mouse cell ZMC1 sensitivity	Excel; Prism	lab computer	contact Dr. Carpizo with data request
Data supporting figure 2e	Annexin V	Excel; Prism	lab computer	contact Dr. Carpizo with data request
Data supporting figure 2f	b-gal staining	Excel; Prism	lab computer	contact Dr. Carpizo with data request
Data supporting figure 3a	KM_172_zmc_60 day; 172_zmc	Excel; Prism	lab computer	contact Dr. Carpizo with data request
Data supporting figure 3b	KM_Pff_zmc; Pff_zmc	Excel; Prism	lab computer	contact Dr. Carpizo with data request
Data supporting figure 3d	KM_172_Zn1; 172_Zn1	Excel; Prism	lab computer	contact Dr. Carpizo with data request
Data supporting figure 3e	Comparisons of ZMC1, olaparib and Z+O	Excel; jpeg	lab computer	contact Dr. Carpizo with data request
Data supporting figure 3g	CC3 quantitation	Excel; Prism	lab computer	contact Dr. Carpizo with data request
Data supporting figure 4a	implanted tumor_Z_O	Excel; Prism	lab computer	contact Dr. Carpizo with data request
Data supporting figure 4b	6264_ctrl; 6264_z; 6264_o; 6264_z+o	Excel; Prism	lab computer	contact Dr. Carpizo with data request
Data supporting figure 4c	KM_DSS	Excel; Prism	lab computer	contact Dr. Carpizo with data request
Data supporting figure 4d	KM_OS	Excel; Prism	lab computer	contact Dr. Carpizo with data request
Data supporting figure 4e	Comparisons of ZMC1 and Zn1	Excel; jpeg	lab computer
